# Supplementary material for: Room-temperature triethylamine sensing of a chemiresistive sensor based on Sm-doped SnS2/ZnS hierarchical microspheres
Source: Royal Society of Chemistry journal article supplement (doi:10.1039/d2nj02683j), 2022-01-01
Supplement: d2nj02683j1.pdf [file d2nj02683j1.pdf]

## Supporting Information

### Room-temperature triethylamine sensing of chemiresistive sensor based on Sm doped SnS<sub>2</sub>/ZnS hierarchical microspheres

Feng Li<sup>a,\*</sup>, Ziqiang Zeng<sup>a</sup>, Mingyang Wu<sup>a</sup>, Leda Liu<sup>a</sup>, Wenlong Li<sup>a</sup>, Fobao Huang<sup>a</sup>, Wei Li<sup>a</sup>,  
He Guan<sup>a,\*</sup>, Wangchang Geng<sup>b,\*</sup>

<sup>a</sup> School of Microelectronics, Northwestern Polytechnical University, Xi'an 710072, P. R.  
China.

<sup>b</sup> Xi'an Key Laboratory of Functional Organic Porous Materials, School of Chemistry  
and Chemical Engineering, Northwestern Polytechnical University, Xi'an 710072, P. R.  
China.

1

---

<sup>1</sup>E-mail address: [fengli1910@nwpu.edu.cn](mailto:fengli1910@nwpu.edu.cn) (F. Li), [he.guan@nwpu.edu.cn](mailto:he.guan@nwpu.edu.cn) (H. Guan), [w.geng@nwpu.edu.cn](mailto:w.geng@nwpu.edu.cn) (W. Geng).

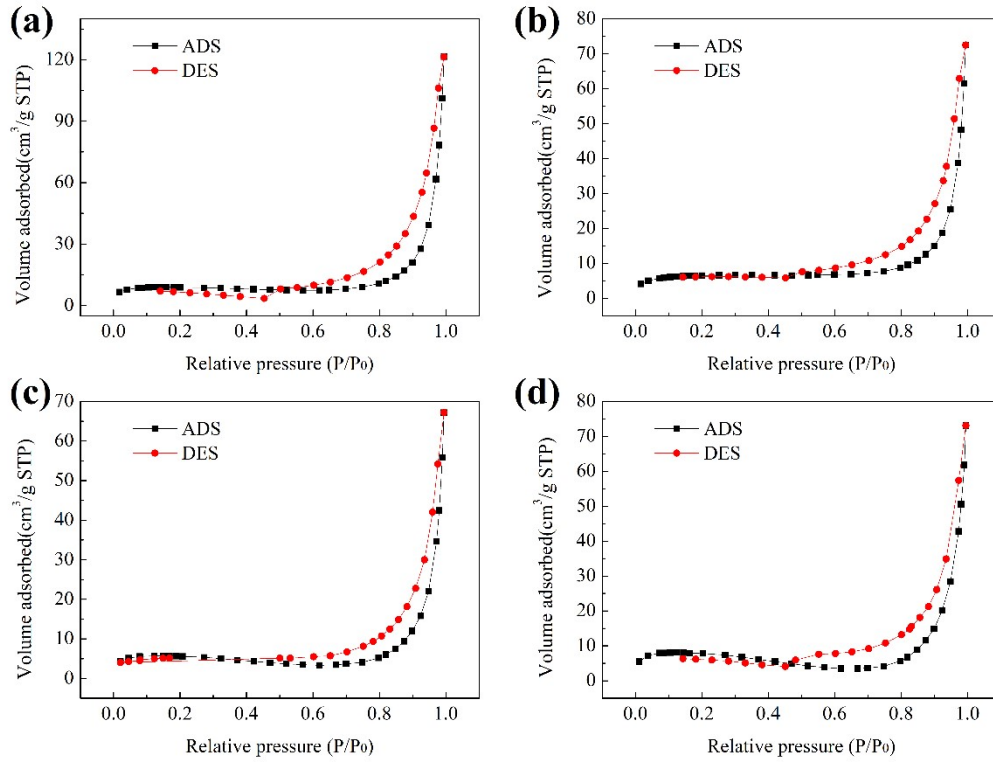

Fig. S1. Nitrogen adsorption–desorption isotherm of pristine SnS<sub>2</sub>/ZnS and Sm doped SnS<sub>2</sub>/ZnS composites. (a) SnS<sub>2</sub>/ZnS-0; (b) SnS<sub>2</sub>/ZnS-1.5; (c) SnS<sub>2</sub>/ZnS-3.0; (d) SnS<sub>2</sub>/ZnS-4.5.
